# Supplementary material for: Re-visiting protein-centric two-tier classification of existing DNA-protein complexes
Source: PubMed Central journal article supplement (PMC3472317; doi:10.1186/1471-2105-13-165), 2012-07-16
Supplement: 1471-2105-13-165-S3.pdf [file 1471-2105-13-165-S3.pdf]

Additional file 3: Ternary DNA-protein complexes

| Ternary Complex | Type I                                       | Type II                     |
|-----------------|----------------------------------------------|-----------------------------|
| 1MDM            | Homeodomain<br>(HTH)                         | Ets<br>(wHTH)               |
| 1T2K            | Interferon<br>regulatory<br>factor<br>(wHTH) | bzip<br>(Zipper)            |
| 1GTO            | Homeodomain<br>(HTH)                         | HMG<br>(Other alpha)        |
| 1NGM            | TF2b<br>(HTH)                                | Tata Box<br>(Beta sheet)    |
| 1NH2            | TF2b<br>(HTH)                                | Tata Box<br>(Beta sheet)    |
| 1NVP            | TF2b<br>(HTH)                                | Tata Box<br>(Beta sheet)    |
| 1RM1            | TF2b<br>(HTH)                                | Tata Box<br>(Beta sheet)    |
| 2O61            | Inteferon<br>Regulatory<br>(wHTH)            | Ig fold like<br>(Other)     |
| 1H88            | Rap1<br>(HTH)                                | bzip<br>(zipper)            |
| 1H89            | Rap1<br>(HTH)                                | bzip<br>(zipper)            |
| 1H8A            | Rap1<br>(HTH)                                | bzip<br>(zipper)            |
| 2D5V            | Homeodomain<br>(HTH)                         | Cut domain<br>(Other alpha) |
