# Supplementary material for: Re-visiting protein-centric two-tier classification of existing DNA-protein complexes
Source: PubMed Central journal article supplement (PMC3472317; doi:10.1186/1471-2105-13-165), 2012-07-16
Supplement: 1471-2105-13-165-S8.pdf [file 1471-2105-13-165-S8.pdf]

**Additional file 8: RPS-BLAST alignment of new member of Homeodomain family (1JGG) with Homeodomain representatives (1HDD and 1FJL).**

---

Query= 1JGG

| Sequences producing significant alignments: | Score  | E     |
|---------------------------------------------|--------|-------|
|                                             | (bits) | Value |
| 1HDD                                        | 61     | 6e-13 |
| 1FJL                                        | 45     | 3e-08 |

>1HDD  
Length = 57

Score = 60.5 bits (147), Expect = 6e-13  
Identities = 27/56 (48%), Positives = 42/56 (75%)

Query: 1 RYRTAFTRDQLGRLEKEFYKENYVSRPRRCELAAQLNLPSTIKVWFQNRMRMCKR 56  
R RTAF+ +QL RL++EF + Y++ RR +L+++L L E+ IK+WFQN+R K K+

Sbjct: 1 RPRTAFSSEQLARLKREFNENRYLTERRRQQLSSELGLNEAQIKIWFQNKRAKIKK 56

Score = 60.5 bits (147), Expect = 6e-13  
Identities = 27/56 (48%), Positives = 42/56 (75%)

Query: 58 RYRTAFTRDQLGRLEKEFYKENYVSRPRRCELAAQLNLPSTIKVWFQNRMRMCKR 113  
R RTAF+ +QL RL++EF + Y++ RR +L+++L L E+ IK+WFQN+R K K+

Sbjct: 1 RPRTAFSSEQLARLKREFNENRYLTERRRQQLSSELGLNEAQIKIWFQNKRAKIKK 56

>1FJL  
Length = 123

Score = 45.0 bits (107), Expect = 3e-08  
Identities = 45/108 (41%), Positives = 62/108 (57%), Gaps = 7/108 (6%)

Query: 13 RLEKEFYKENYVSRPRRCELAAQLNLPSTIKVWFQNRMRMCKRQ-----RYRTAFTR 65  
LE+ F + Y R ELA + NL E+ I+VWFQNR + ++Q R RT F+

Sbjct: 16 ELERAFERTQYPDIYTREELAQRINLTEARIQVWFQNRARRLRKQHTSVSQRSRITFSA 75

Query: 66 DQLGRLEKEFYKENYVSRPRRCELAAQLNLPSTIKVWFQNRMRMCKR 113  
QL LE+ F + Y R ELA + NL E+ I+VWFQNR + ++

Sbjct: 76 SQLDELERAFERTQYPDIYTREELAQRINLTEARIQVWFQNRARRLRK 123

Score = 35.4 bits (82), Expect = 2e-05  
Identities = 24/54 (44%), Positives = 33/54 (61%)

Query: 3 RTAFTRDQLGRLEKEFYKENYVSRPRRCELAAQLNLPSTIKVWFQNRMRMCKR 56  
RT F+ QL LE+ F + Y R ELA + NL E+ I+VWFQNR + ++

Sbjct: 70 RTTFASQLDELERAFERTQYPDIYTREELAQRINLTEARIQVWFQNRARRLRK 123
