# Supplementary material for: Re-visiting protein-centric two-tier classification of existing DNA-protein complexes
Source: PubMed Central journal article supplement (PMC3472317; doi:10.1186/1471-2105-13-165), 2012-07-16
Supplement: 1471-2105-13-165-S10.pdf [file 1471-2105-13-165-S10.pdf]

Additional file 10: Examples of DNA-binding proteins identified by only profile based search methods RPS-BLAST and HMM in *Arabidopsis thaliana*

| <b>Arabidopsis Protein ID</b> | <b>Arabidopsis Protein name</b>                               |
|-------------------------------|---------------------------------------------------------------|
| AT1G01260.1                   | basic helix-loop-helix (bHLH) DNA-binding superfamily protein |
| AT1G07980.1                   | nuclear factor Y, subunit C10                                 |
| AT1G08000.1                   | GATA transcription factor 10                                  |
| AT1G01380.1                   | Homeodomain-like superfamily protein                          |
| AT3G29340.1                   | zinc finger (C2H2 type) family protein                        |
